# Supplementary material
Source: publisher site journal article supplement (doi:10.18632/aging.203856)
Supplement: Supplementary file 1 [file aging-v14-203856-supplementary-material-SD1.pdf]

## SUPPLEMENTARY FIGURES

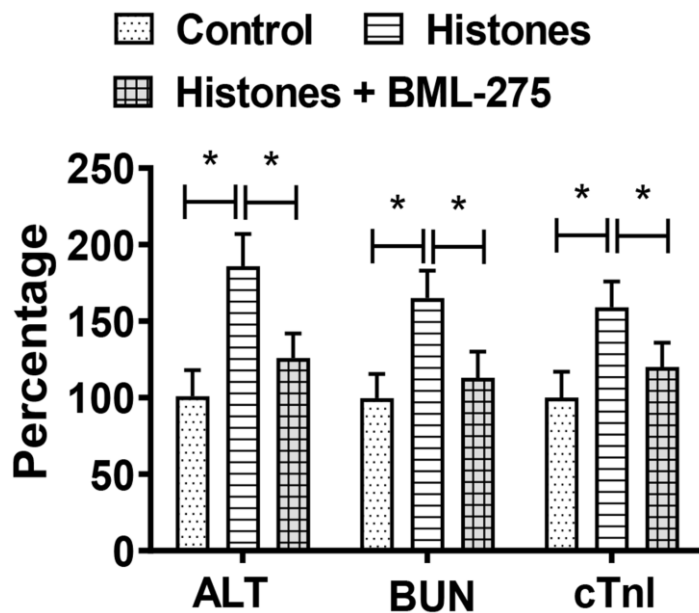

**Supplementary Figure 1. ELISA detected the amount of organ injury markers in blood of mice.** Changes of organ injury markers are presented as percentage by setting that without treatment as 100%. Means  $\pm$  SD are presented; Student's *t*-test, \**P* < 0.05 vs. the corresponding control.

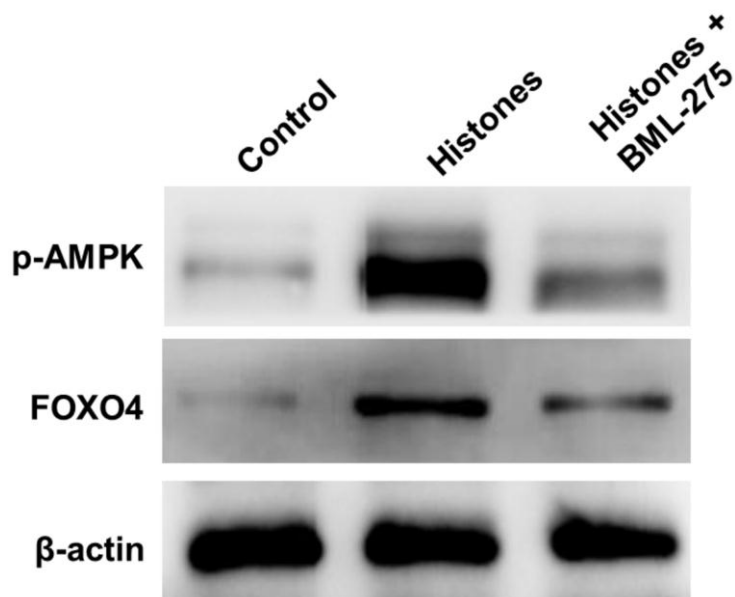

**Supplementary Figure 2. Western blotting detected the AMPK/FOXO4 pathway proteins level vascular tissues of mice after histones or histones + BML-275 treatment.**
